# Supplementary material for: Swine-to-Ferret Transmission of Antigenically Drifted Contemporary Swine H3N2 Influenza A Virus Is an Indicator of Zoonotic Risk to Humans
Source: MDPI journal article supplement (doi:10.3390/v15020331), 2023-01-24
Supplement: s1 [file s1]

## Supplementary Materials

**Table S1.** Amino acid differences between human seasonal vaccine A/Iowa/60/2018 and the 1990.1 clade represented by A/swine/Missouri/A02257614/2018 strain. Annotations include mutations within putative epitope and receptor binding sites.

| H3 Amino Acid Residue | A/Iowa/60/2018 HuVac | A/swine/Mis-souri/A02257614/2018 | 3.1990.1_consensus | Annotations |
|-----------------------|----------------------|----------------------------------|--------------------|-------------|
| 3                     | I                    | L                                | L                  |             |
| 9                     | S                    |                                  | R                  |             |
| 25                    | I                    | L                                | L                  |             |
| 33                    | R                    | Q                                | Q                  |             |
| 45                    | N                    | S                                | S                  |             |
| 48                    | I                    | T                                | T                  |             |
| 50                    | E                    | R                                | R                  |             |
| 57                    | Q                    | R                                | R                  |             |
| 62                    | G                    | K                                | K                  |             |
| 75                    | Q                    | H                                | H                  |             |
| 83                    | K                    | E                                | E                  |             |
| 88                    | V                    | I                                | I                  |             |
| 92                    | R                    | K                                | K                  |             |
| 106                   | A                    | S                                | S                  |             |
| 121                   | K                    | T                                | T                  |             |
| 124                   | S                    | D                                | D                  |             |
| 131                   | K                    | A                                | A                  |             |
| 133                   | N                    | D                                | D                  | Site A, RBS |
| 135                   | T                    | G                                | G                  | RBS         |
| 137                   | S                    | Y                                | Y                  | Site A      |
| 138                   | A                    | S                                | S                  |             |
| 140                   | I                    | K                                | K                  |             |
| 144                   | S                    | V                                | V                  | Site A      |
| 145                   | S                    | K                                | K                  | Site A      |
| 155                   | T                    | H                                | H                  | Site B      |
| 156                   | H                    | K                                | K                  |             |
| 158                   | N                    | E                                | E                  |             |
| 160                   | T                    | K                                | K                  |             |
| 171                   | K                    | N                                | N                  |             |
| 172                   | E                    | D                                | D                  |             |
| 173                   | Q                    | K                                | K                  |             |
| 186                   | G                    | S                                | S                  | Site B      |
| 189                   | K                    | S                                | S                  | Site B, RBS |
| 190                   | D                    | E                                | E                  | RBS         |
| 192                   | I                    | T                                | T                  | RBS         |
| 193                   | F                    | S                                | S                  | Site B, RBS |

|                            |   |    |    |        |
|----------------------------|---|----|----|--------|
| 196                        | A | V  | V  |        |
| 198                        | S | A  | A  |        |
| 199                        | S | I  | I  |        |
| 202                        | I | V  | V  |        |
| 208                        | R | S  | S  | Site D |
| 212                        | A | T  | T  |        |
| 222                        | R | W  | W  | RBS    |
| 223                        | I | V  | V  | RBS    |
| 225                        | D | G  | G  | RBS    |
| 227                        | P | S  | S  |        |
| 246                        | N | S  | S  |        |
| 262                        | S | N  | N  |        |
| 275                        | G | D  | D  | Site C |
| 276                        | K | N  | N  |        |
| 278                        | K | Y  | Y  | Site C |
| 307                        | R | K  | K  |        |
| 312                        | S | K  | K  |        |
| Differences from consensus |   | -  | 52 |        |
| Differences from HuVac     |   | 51 | -  |        |

**Table S2.** Amino acid differences between A/Minnesota/11/2010 CVV and the 1990.4.A clade represented by A/swine/North Carolina/A02245294/2019 and 1990.4.B.2 clade represented by A/swine/Illinois/A02479007/2020. Annotations include mutations within putative epitope and receptor binding sites.

| H3 Amino Acid Residue      | A/Minnesota/11/2010<br>CVV | A/swine/North Caro-<br>lina/A02245294/2019 | A/swine/Illi-<br>nois/A02479007/2020 | 1990.4.A_consensus | 1990.4.B.2_consensus | Annotations |
|----------------------------|----------------------------|--------------------------------------------|--------------------------------------|--------------------|----------------------|-------------|
| 27                         | K                          |                                            | R                                    |                    |                      |             |
| 53                         | N                          |                                            | S                                    |                    | S                    | Site C      |
| 56                         | H                          |                                            | Y                                    |                    |                      |             |
| 57                         | Q                          |                                            | K                                    |                    | K                    |             |
| 83                         | E                          |                                            | K                                    |                    | K                    |             |
| 96                         | N                          | S                                          |                                      | S                  |                      |             |
| 106                        | A                          |                                            | T                                    |                    |                      |             |
| 107                        | T                          |                                            | S                                    |                    | S                    |             |
| 117                        | N                          |                                            | T                                    |                    | T                    |             |
| 119                        | E                          | K                                          |                                      | K                  |                      |             |
| 121                        | T                          |                                            | N                                    |                    | N                    |             |
| 124                        | S                          | I                                          |                                      | I                  |                      |             |
| 131                        | A                          | T                                          |                                      | T                  |                      |             |
| 137                        | Y                          |                                            | I                                    |                    | N                    | Site A      |
| 138                        | A                          | S                                          |                                      | S                  |                      |             |
| 140                        | R                          |                                            | K                                    |                    |                      |             |
| 142                        | G                          |                                            |                                      |                    | E                    |             |
| 144                        | V                          |                                            | D                                    |                    | N                    | Site A      |
| 145                        | N                          |                                            | S                                    |                    | K                    | Site A      |
| 156                        | N                          | H                                          | H                                    | H                  | H                    |             |
| 159                        | Y                          |                                            |                                      |                    | N                    |             |
| 163                        | E                          |                                            | A                                    |                    | A                    |             |
| 164                        | Q                          |                                            | L                                    |                    | L                    |             |
| 193                        | N                          |                                            |                                      |                    | Y                    | Site B, RBS |
| 199                        | S                          |                                            | Q                                    |                    | P                    |             |
| 203                        | I                          |                                            |                                      |                    | T                    |             |
| 204                        | V                          |                                            | I                                    |                    | I                    |             |
| 207                        | K                          | R                                          |                                      | R                  |                      | Site D      |
| 216                        | N                          |                                            | D                                    |                    |                      |             |
| 217                        | I                          |                                            | V                                    |                    | V                    | Site D      |
| 236                        | I                          |                                            | V                                    |                    |                      |             |
| 242                        | I                          |                                            | M                                    |                    | M                    |             |
| 252                        | I                          |                                            | V                                    |                    |                      |             |
| 273                        | H                          |                                            | P                                    |                    | P                    |             |
| 276                        | E                          |                                            | N                                    |                    | N                    |             |
| 278                        | N                          |                                            | S                                    |                    |                      | Site C      |
| 289                        | P                          | S                                          |                                      | S                  |                      |             |
| 299                        | K                          |                                            | R                                    |                    | R                    |             |
| 323                        | V                          | I                                          |                                      | I                  |                      |             |
| Differences from consensus |                            | -                                          | -                                    | 9                  | 23                   |             |

Differences from CVV

9

27

-

-

**Table S3.** Amino acid differences between A/Ohio/28/2016 CVV and the 2010.1 clade represented by A/Indiana/27/2018 variant strain. Annotations include mutations within putative epitope and receptor binding sites.

| H3 Amino Acid Residue      | A/Ohio/28/2016<br>CVV | A/Indiana/27/2018 | 3.2010.1 consensus | Annotations |
|----------------------------|-----------------------|-------------------|--------------------|-------------|
| 56                         | H                     | Y                 |                    |             |
| 138                        | A                     | S                 | S                  |             |
| 142                        | R                     | G                 |                    |             |
| 145                        | K                     | N                 | N                  | Site A      |
| 156                        | H                     | R                 |                    |             |
| 158                        | N                     | D                 |                    |             |
| 189                        | K                     | T                 |                    | Site B, RBS |
| 209                        | S                     | N                 |                    |             |
| Differences from consensus |                       | -                 | 2                  |             |
| Differences from CVV       |                       | 8                 | -                  |             |

**Table S4.** Amino acid differences between A/Ohio/28/2016 CVV and A/Iowa/60/2018 HuVac. Annotations include mutations within putative epitope and receptor binding sites.

| H3 Amino Acid Residue | A/Ohio/28/2016<br>CVV | A/Iowa/60/2018<br>HuVac | Annotations |
|-----------------------|-----------------------|-------------------------|-------------|
| 3                     | L                     | I                       |             |
| 9                     | N                     | S                       |             |
| 10                    | M                     | T                       |             |
| 33                    | Q                     | R                       |             |
| 45                    | S                     | N                       |             |
| 46                    | F                     | S                       |             |
| 48                    | T                     | I                       |             |
| 53                    | N                     | D                       | Site C      |
| 62                    | E                     | G                       |             |
| 82                    | N                     | K                       |             |
| 92                    | K                     | R                       |             |
| 94                    | H                     | Y                       |             |
| 121                   | N                     | K                       |             |
| 131                   | T                     | K                       |             |
| 133                   | D                     | N                       | Site A, RBS |
| 135                   | A                     | T                       | RBS         |
| 140                   | K                     | I                       |             |
| 142                   | R                     | G                       |             |
| 145                   | K                     | S                       | Site A      |
| 159                   | F                     | Y                       |             |

|     |   |   |             |
|-----|---|---|-------------|
| 160 | K | T |             |
| 165 | E | N |             |
| 171 | N | K |             |
| 186 | A | G | Site B      |
| 193 | S | F | Site B, RBS |
| 198 | A | S |             |
| 199 | A | S |             |
| 203 | I | T |             |
| 223 | V | I | RBS         |
| 238 | R | K |             |
| 278 | N | K | Site C      |
| 280 | A | E |             |
| 312 | N | S |             |
| 323 | I | V |             |

**Table S5.** Percentage of macroscopic lung lesions and microscopic lung and trachea scores of pigs.

| Clade Group | Pig # | Macroscopic Lung Lesions (%) | Microscopic Lung Lesions Score (0–22) | Microscopic Trachea Lesions Score (0–8) |
|-------------|-------|------------------------------|---------------------------------------|-----------------------------------------|
| 1990.1      | 446   | 0.4                          | 0.0                                   | 3.0                                     |
|             | 447   | 0.0                          | 0.0                                   | 0.0                                     |
|             | 448   | 0.0                          | 0.0                                   | 4.0                                     |
| 1990.4.A    | 451   | 0.0                          | 2.0                                   | 1.0                                     |
|             | 452   | 0.6                          | 0.5                                   | 4.0                                     |
|             | 453   | 0.0                          | 1.0                                   | 2.5                                     |
| 1990.4.B.2  | 456   | 1.3                          | 3.0                                   | 4.0                                     |
|             | 457   | 0.5                          | 0.0                                   | 1.0                                     |
|             | 458   | 1.6                          | 0.0                                   | 5.0                                     |
| NC          | 441   | 0.0                          | 0.0                                   | 0.0                                     |
|             | 442   | 0.0                          | 0.0                                   | 0.0                                     |
|             | 443   | 0.0                          | 0.0                                   | 0.0                                     |

**Table S6.** Pig HI data at 0, 5 and 14 dpi.

| Clade Group | Pig # | 0 dpi | 5 dpi | 14 dpi |
|-------------|-------|-------|-------|--------|
| NC          | 441   | <10   | <10   | -      |
|             | 442   | <10   | <10   | -      |
|             | 443   | <10   | <10   | -      |
|             | 444   | <10   | <10   | <10    |
|             | 445   | <10   | <10   | <10    |
| 1990.1      | 446   | <10   | 10    | -      |
|             | 447   | <10   | 10    | -      |
|             | 448   | <10   | 10    | -      |
|             | 449   | <10   | NA    | 160    |
|             | 450   | <10   | NA    | 160    |
| 1990.4.A    | 451   | <10   | 10    | -      |
|             | 452   | <10   | 10    | -      |
|             | 453   | <10   | 20    | -      |
|             | 454   | <10   | NA    | 320    |
|             | 455   | <10   | NA    | 320    |
| 1990.4.B.2  | 456   | <10   | 10    | -      |
|             | 457   | <10   | 20    | -      |
|             | 458   | <10   | 10    | -      |

|                                                    |     |     |    |     |
|----------------------------------------------------|-----|-----|----|-----|
|                                                    | 459 | <10 | NA | 320 |
|                                                    | 460 | <10 | NA | 320 |
| NA (not applicable)                                |     |     |    |     |
| Dash indicates pigs that were necropsied at 5 dpi. |     |     |    |     |

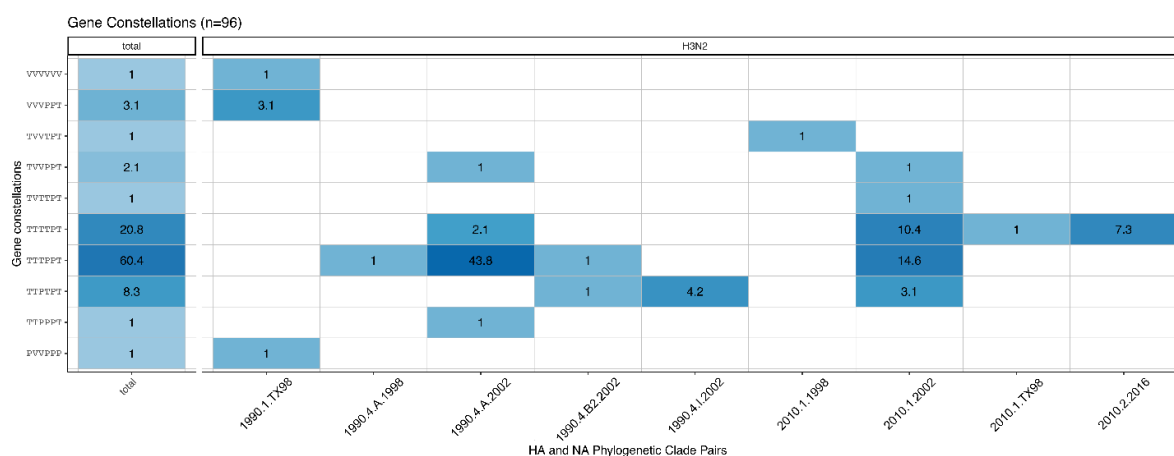

**Figure S1.** Proportions of detected H3N2 influenza A virus in swine with whole genome data collected in 2020 in the USDA influenza A virus in swine surveillance system. The x-axis reflects the paired genetic clade of hemagglutinin (HA) and neuraminidase (NA), and the y-axis reflects the evolutionary lineage (triple-reassortant, T; H1N1pdm09, P; live attenuated vaccine virus associated, V) of the internal genes in the order of PB2-PB1-PA-NP-M-NS.
